# Supplementary material for: Correction: Clinical and Economic Benefit of Advanced Therapies for the Treatment of Active Ankylosing Spondylitis
Source: Springer Nature journal article supplement (doi:10.1007/s40744-023-00626-1), 2023-11-29
Supplement: MOESM1 [file 26373898]

Clinical and economic benefit of advanced therapies for the treatment of Active Ankylosing Spondylitis

**Running title: Clinical and Economic Benefit of Advanced Therapies for Ankylosing Spondylitis**

**Authors:** Jessica A. Walsh,<sup>1</sup> Christopher D Saffore,<sup>2</sup> Eric B Collins,<sup>3</sup> Andrew Ostor<sup>4,5</sup>

**Affiliations:**

<sup>1</sup>Salt Lake City Veterans Affairs and University of Utah, USA; <sup>2</sup>AbbVie Inc., North Chicago, IL, USA; <sup>3</sup>Medicus Economics LLC, Boston, MA, USA; <sup>4</sup>Cabrini Medical Center, Monash University, Melbourne, Australia; <sup>5</sup>Australian National University, Canberra, Australia.

**Corresponding Author:** Jessica A. Walsh

**Address:** Division of Rheumatology, Clinic 2

50 North Medical Drive

Salt Lake City, UT 84132

**Phone:** (801) 581-2121

**Email:** Jessica.Walsh@hsc.utah.edu.

## Supplementary materials

### Supplementary Table 1: RCTs Included in NMA

| Study                                      | Intervention arm(s)                                                                                                             | Comparator arm(s)                                     | Study design                                                                                  | NSAID/csDMARD experience                                                                                                                                                                                                  | bDMARD experience | Total N | Duration of randomized phase (weeks) | Primary endpoint | Primary (secondary) reference(s) used                                                                          |
|--------------------------------------------|---------------------------------------------------------------------------------------------------------------------------------|-------------------------------------------------------|-----------------------------------------------------------------------------------------------|---------------------------------------------------------------------------------------------------------------------------------------------------------------------------------------------------------------------------|-------------------|---------|--------------------------------------|------------------|----------------------------------------------------------------------------------------------------------------|
| ATLAS<br>(NCT00085644)                     | Adalimumab, 40 mg, SC injection, at Week 0 and Q2W for 24 Weeks                                                                 | Placebo, SC injection, at Week 0 and Q2W for 24 Weeks | Phase 3<br># treatment arms, 2<br># centers, 43<br>Randomisation, 2:1<br>Blinding: Double     | <u>Prior</u> : IR or intolerant to $\geq 1$ NSAID or cDMARD<br><u>Concurrent</u> : Allowed stable ( $\geq 4$ w) doses of SSZ ( $\leq 3$ g/d), MTX ( $\leq 25$ mg/w), HCL ( $\leq 400$ mg/d), CS ( $\leq 10$ mg/d), NSAIDs | Naïve             | 315     | 12                                   | ASAS20; Week 12  | van der Heijde 2006 <sup>1</sup>                                                                               |
| Bao 2014<br>(NCT01248793)                  | Golimumab, 50 mg, SC injection at Week 0 and Q4W to Week 48                                                                     | Placebo, SC injection, Q4W, Weeks 0-20                | Phase 3<br># treatment arms: 2<br># centers: 12<br>Randomisation: 1:1<br>Blinding: Double     | NR                                                                                                                                                                                                                        | Naïve             | 213     | 16                                   | ASAS20; Week 14  | Bao 2014 <sup>2</sup>                                                                                          |
| Calin 2004<br>(NCT00421915; 0881A3-311-EU) | Etanercept, 25 mg, SC injection, at Week 0, BIW to Week 12                                                                      | Placebo, SC injection, at Week 0, BIW to Week 12      | Phase 3<br># treatment arms, 2<br># centers, 14<br>Randomisation, 1:1<br>Blinding: Double     | NR                                                                                                                                                                                                                        | Naïve             | 84      | 12                                   | ASAS 20; Week 12 | Calin 2004 <sup>3</sup> (Dijkmans 2009 <sup>4</sup> )                                                          |
| COAST-V<br>(NCT02696785)                   | Ixekizumab, 80 mg Q2W or 80 mg Q4W, SC injections; starting dose of 80 mg or 160 mg (1:1) at Week 0 for both Q2W and Q4W groups | Placebo or Adalimumab 40 mg, Q2W, SC injections       | Phase 3<br># treatment arms, 4<br># centers, 84<br>Randomisation, 1:1:1:1<br>Blinding: Double | <u>Prior</u> : IR or intolerant to $\geq 2$ NSAIDs                                                                                                                                                                        | Naïve             | 341     | 16                                   | ASAS40; Week 16  | van der Heijde 2018 <sup>5</sup> (Dougados 2020 <sup>6</sup> , CADTH IXE Clinical Review Report <sup>7</sup> ) |

| Study                    | Intervention arm(s)                                                                                                             | Comparator arm(s)                                            | Study design                                                                                    | NSAID/csDMARD experience                                                                                                                                        | bDMARD experience                                                                                                                                                                        | Total N | Duration of randomized phase (weeks) | Primary endpoint | Primary (secondary) reference(s) used                      |
|--------------------------|---------------------------------------------------------------------------------------------------------------------------------|--------------------------------------------------------------|-------------------------------------------------------------------------------------------------|-----------------------------------------------------------------------------------------------------------------------------------------------------------------|------------------------------------------------------------------------------------------------------------------------------------------------------------------------------------------|---------|--------------------------------------|------------------|------------------------------------------------------------|
| COAST-W (NCT02696798)    | Ixekizumab, 80 mg Q2W or 80 mg Q4W, SC injections; starting dose of 80 mg or 160 mg (1:1) at Week 0 for both Q2W and Q4W groups | Placebo, SC injections, Q2W                                  | Phase 3<br># treatment arms, 3<br># centers, 106<br>Randomisation, 1:1:1<br>Blinding: Double    | <u>Concurrent:</u> Allowed NSAIDs at stable dose                                                                                                                | <u>Prior:</u> discontinued at least 1 TNFi, but no more than 2 TNFi, either due to intolerance or due to an IR to treatment with a single TNFi for at least 12 weeks at an adequate dose | 316     | 16                                   | ASAS40; Week 16  | Deodhar 2019 <sup>8</sup><br>(Dougados 2019 <sup>6</sup> ) |
| Davis 2003               | Etanercept, 25 mg, SC, BIW at Week 0 to Week 24                                                                                 | Placebo, SC, BIW at Week 0 to Week 24                        | Phase NR<br># treatment arms: 2<br># centers: 28<br>Randomisation: 1:1<br>Blinding: Double      | NR                                                                                                                                                              | Naïve                                                                                                                                                                                    | 277     | 24                                   | ASAS20; Week 12  | Davis 2003 <sup>9</sup>                                    |
| GO-RAISE (NCT00265083)   | Golimumab, 50 mg or 100 mg, SC injection, 2 injections Q4W at Week 0 to Week 24                                                 | Placebo, SC injection, 2 injections Q4W at Week 0 to Week 24 | Phase 3<br># treatment arms: 3<br># centers: 57<br>Randomisation: 1:1.8:1.8<br>Blinding: Double | <u>Prior:</u> IR or intolerant to NSAID or DMARDs<br><u>Concurrent:</u> Allowed stable doses of SSZ, MTX, HCL, CS, NSAIDs                                       | Naïve                                                                                                                                                                                    | 356     | 16                                   | ASAS20; Week 14  | Inman 2008 <sup>10</sup>                                   |
| Gorman 2002              | Etanercept, 25 mg, SC injection twice weekly                                                                                    | Placebo, SC injection twice weekly                           | Phase NR<br># treatment arms: 2<br># centers: NR<br>Randomisation: 1:1<br>Blinding: Double      | <u>Concurrent:</u> Allowed stable ( $\geq 4w$ ) doses of SSZ ( $\leq 3 g/d$ ), MTX ( $\leq 20 mg/w$ ), gold injections (50 mg/m), CS ( $\leq 10 mg/d$ ), NSAIDs | Naïve (assumed as bDMARDs were likely not yet available <sup>a</sup> )                                                                                                                   | 40      | 16                                   | ASAS20; Week 16  | Gorman 2002 <sup>11</sup>                                  |
| Huang 2014 (NCT01114880) | Adalimumab, 40 mg, SC injection, at Week 0 and Q2W for 12 Weeks                                                                 | Placebo, SC injection at Week 0 and Q2W for 12 Weeks         | Phase 3<br># treatment arms: 2<br># centers: 9<br>Randomisation:                                | <u>Prior:</u> IR or intolerant to $\geq 1$ NSAID<br><u>Concurrent:</u> Allowed stable doses of SSZ                                                              | Naïve                                                                                                                                                                                    | 344     | 12                                   | ASAS20; Week 12  | Huang 2014 <sup>12</sup>                                   |

| Study                                              | Intervention arm(s)                                                                                                                                        | Comparator arm(s)                                                      | Study design                                                                                | NSAID/csDMARD experience                                                                                                                                                       | bDMARD experience                                                                                                  | Total N | Duration of randomized phase (weeks) | Primary endpoint   | Primary (secondary) reference(s) used                                                                                          |
|----------------------------------------------------|------------------------------------------------------------------------------------------------------------------------------------------------------------|------------------------------------------------------------------------|---------------------------------------------------------------------------------------------|--------------------------------------------------------------------------------------------------------------------------------------------------------------------------------|--------------------------------------------------------------------------------------------------------------------|---------|--------------------------------------|--------------------|--------------------------------------------------------------------------------------------------------------------------------|
|                                                    | Q2W for 12 Weeks                                                                                                                                           |                                                                        | 2:1<br>Blinding: Double                                                                     | (≤3 g/d), MTX (≤25 mg/w), CS (≤10 mg/d), NSAIDs, analgesics                                                                                                                    |                                                                                                                    |         |                                      |                    |                                                                                                                                |
| M03-606<br>Canadian AS Study<br>(NCT00195819)      | Adalimumab, 40 mg, SC injections at Week 0 and Q2W for 24 Weeks                                                                                            | Placebo, SC injection at Week 0 and Q2W for 24 Weeks                   | Phase 3<br># treatment arms: 2<br># centers: 11<br>Randomisation: 1:1<br>Blinding: Double   | <u>Prior</u> : IR or intolerant to ≥1 NSAID or DMARD<br><u>Concurrent</u> : Allowed stable (≥4w) doses of SSZ (≤3 g/d), MTX (≤25 mg/w), HCL (≤400 mg/d), CS (≤10 mg/d), NSAIDs | Naïve                                                                                                              | 82      | 24                                   | ASAS20;<br>Week 12 | Lambert 2007 <sup>13</sup><br>(Maksymowych 2008 <sup>14</sup> )                                                                |
| MEASURE 1<br>(NCT01358175<br>(ext<br>NCT01863732)) | Secukinumab, 10 mg/kg (IV loading dose) at Weeks 0, 2, and 4, followed by SC injections of secukinumab 150 mg or 75 mg Q4W starting at Week 8, for 2 years | Placebo, IV at Week 0, 2, and 4, then SC injections Q4W until Week 16. | Phase 3<br># treatment arms, 3<br># centers, 65<br>Randomisation, 1:1:1<br>Blinding: Double | <u>Prior</u> : Maximum tolerated doses of NSAIDs                                                                                                                               | Mixed (previous use of anti-TNFs allowed, but washout period required) - Data for naïve and IR subgroups available | 371     | 16                                   | ASAS20;<br>Week 16 | Baeten 2015 <sup>15</sup><br>(Deodhar 2016 <sup>16</sup> )                                                                     |
| MEASURE 2<br>(NCT01649375)                         | Secukinumab, 150 mg or 75 mg, SC injections at Weeks 0, 1, 2, and 3 and Q4W starting at Week 4 for 5 years                                                 | Placebo, SC injection, at Weeks 0, 1, 2, and 3, and Q4W until Week 16  | Phase 3<br># treatment arms: 3<br># centers: 53<br>Randomisation: 1:1:1<br>Blinding: Double | <u>Prior</u> : Previous used of DMARDs allowed<br><u>Concurrent</u> : Allowed stable doses of SSZ, MTX, CS, NSAIDs                                                             | Mixed (previous use of anti-TNFs allowed, but washout period required) - Data for naïve and IR subgroups available | 219     | 16                                   | ASAS20;<br>Week 16 | Baeten 2015 <sup>15</sup><br>(Sieper 2017 <sup>17</sup> ;<br>Deodhar 2019 <sup>18</sup> ;<br>Marzo-Ortega 2019 <sup>19</sup> ) |

| Study                          | Intervention arm(s)                                                                                                                                            | Comparator arm(s)                                                                                       | Study design                                                                                | NSAID/csDMARD experience                                                  | bDMARD experience                                                                                                  | Total N | Duration of randomized phase (weeks) | Primary endpoint   | Primary (secondary) reference(s) used |
|--------------------------------|----------------------------------------------------------------------------------------------------------------------------------------------------------------|---------------------------------------------------------------------------------------------------------|---------------------------------------------------------------------------------------------|---------------------------------------------------------------------------|--------------------------------------------------------------------------------------------------------------------|---------|--------------------------------------|--------------------|---------------------------------------|
| MEASURE 3<br>(NCT02008916)     | Secukinumab, 10 mg/kg IV at Weeks 0, 2 and 4 (loading dose), followed by secukinumab 300 mg or 150 mg, SC injections, Q4W starting at Week 8 to end of study   | Placebo, IV infusion at Weeks 0, 2, and 4, followed by SC injections, Q4W starting at Week 8 to Week 16 | Phase 3<br># treatment arms, 3<br># centers, 54<br>Randomisation, 1:1:1<br>Blinding: Double | <u>Prior</u> : Maximum tolerated doses of NSAIDs                          | Mixed (previous use of anti-TNFs allowed, but washout period required) - Data for naïve and IR subgroups available | 226     | 16                                   | ASAS20; Week 16    | Pavelka 2017 <sup>20</sup>            |
| MEASURE 4<br>(NCT02159053)     | Secukinumab, 150 mg, with or without loading dose, SC injections at Weeks 0, 1, 2, and 3 (loading dose) and Q4W starting at Week 4 for 104 Weeks (both groups) | Placebo, SC injection, at Weeks 0, 1, 2, and 3, and Q4W until Week 16                                   | Phase 3<br># treatment arms: 3<br># centers: 85<br>Randomisation: 1:1:1<br>Blinding: Double | <u>Prior</u> : Maximum tolerated doses of NSAIDs ( $\geq 2w$ )            | Mixed (previous use of anti-TNFs allowed, but washout period required) - Data for naïve and IR subgroups available | 350     | 16                                   | ASAS20; Week 16    | Kivitz 2018 <sup>21</sup>             |
| MEASURE 5<br>(NCT02896127)     | Secukinumab, 150 mg, SC injection at Weeks 1, 2, 3, and 4, and Q4W to Week 52                                                                                  | Placebo, SC injection at Weeks 1, 2, 3, and 4, and Q4W to Week 16                                       | Phase 3<br># treatment arms, 2<br># centers, NR<br>Randomisation, 2:1<br>Blinding: Double   | <u>Prior</u> : IR to $\geq 2$ NSAIDs; stable ( $\geq 2w$ ) dose of NSAIDs | Mixed (previous use of anti-TNFs allowed, but washout period required) - Data for naïve and IR subgroups available | 458     | 16                                   | ASAS20; Week 16    | Huang 2020 <sup>22</sup>              |
| Pedersen 2016<br>(NCT00477893) | Adalimumab, 40 mg, SC, at                                                                                                                                      | Placebo, SC, at Week 0                                                                                  | Phase 4<br># treatment                                                                      | <u>Prior</u> : Maximum tolerated doses of                                 | Naïve                                                                                                              | 52      | 12                                   | BASDAI50 ; Week 24 | Pedersen 2016 <sup>23</sup>           |

| Study                                                      | Intervention arm(s)                                       | Comparator arm(s)                                | Study design                                                                                            | NSAID/csDMARD experience                                                                                                                            | bDMARD experience                                                                                                | Total N | Duration of randomized phase (weeks) | Primary endpoint    | Primary (secondary) reference(s) used                           |
|------------------------------------------------------------|-----------------------------------------------------------|--------------------------------------------------|---------------------------------------------------------------------------------------------------------|-----------------------------------------------------------------------------------------------------------------------------------------------------|------------------------------------------------------------------------------------------------------------------|---------|--------------------------------------|---------------------|-----------------------------------------------------------------|
|                                                            | Week 0 and Q2W for 24 Weeks                               | and Q2W for 12 Weeks                             | arms, 2<br># centers, 7<br>Randomisation, 1:1<br>Blinding: Double                                       | ≥2 NSAIDs<br><u>Concurrent:</u> Allowed stable doses NSAIDs (-4 to 12w)                                                                             |                                                                                                                  |         |                                      |                     |                                                                 |
| SELECT-AXIS 1 (NCT03178487)                                | Upadacitinib, 15 mg, oral, at Week 0 and QD to Week 14    | Placebo, oral, at Week 0 and QD to Week 14       | Phase 2/3<br># treatment arms, 2<br># centers, 62<br>Randomisation, 1:1<br>Blinding: Double             | <u>Prior:</u> IR or intolerant to ≥2 NSAIDs                                                                                                         | Naïve                                                                                                            | 187     | 14                                   | ASAS40; Week 14     | van der Heijde 2019 <sup>24</sup> (Data on file <sup>25</sup> ) |
| SELECT-AXIS 2, (NCT04169373) (AS bDMARD-IR sub-population) | Upadacitinib, 15 mg, oral, at Week 0 and QD to Week 14    | Placebo, oral, at Week 0 and QD to Week 14       | Phase 3<br># treatment arms, 2<br># centers, 212 <sup>b</sup><br>Randomisation, 1:1<br>Blinding: Double | <u>Prior:</u> IR or intolerant to ≥2 NSAIDs                                                                                                         | Previously exposed to 1 or 2 bDMARDs, discontinued due to either IR or intolerance                               | 420     | 14                                   | ASAS40; Week 14     | Data on file <sup>26</sup>                                      |
| SPINE (NCT00420238)                                        | Etanercept, 50 mg, SC injection, QW for 12 Weeks          | Placebo, SC injection, QW for 12 Weeks           | Phase 4<br># treatment arms, 2<br># centers, 21<br>Randomisation, 1:1<br>Blinding: Double               | <u>Prior:</u> IR or intolerant to ≥2 NSAIDs at max tolerated dose for ≥3m<br><u>Concurrent:</u> Allowed stable doses of NSAIDs (≥2w), SSZ/MTX (≥4w) | Naïve                                                                                                            | 82      | 12                                   | BASDAI CFB; Week 12 | Dougados 2011 <sup>27</sup>                                     |
| Tofacitinib Phase 3 Study (NCT03502616)                    | Tofacitinib 5 mg, twice daily, oral tablets, for 16 weeks | Placebo, twice daily, oral tablets, for 16 weeks | Phase 3<br># treatment arms, 2<br># centers, 75<br>Randomisation, 1:1<br>Blinding: Double               | <u>Prior:</u> IR or intolerant to ≥2 NSAIDs                                                                                                         | Mixed (approximately 20% of patients IR to ≤2 TNFi or have prior bDMARD use without IR)<br>Data for naïve and IR | 270     | 16                                   | ASAS20; Week 16     | Deodhar 2021 <sup>28</sup>                                      |

| Study                             | Intervention arm(s)                                                   | Comparator arm(s)                                | Study design                                                                                | NSAID/csDMARD experience                        | bDMARD experience                                                                                                           | Total N | Duration of randomized phase (weeks) | Primary endpoint | Primary (secondary) reference(s) used                         |
|-----------------------------------|-----------------------------------------------------------------------|--------------------------------------------------|---------------------------------------------------------------------------------------------|-------------------------------------------------|-----------------------------------------------------------------------------------------------------------------------------|---------|--------------------------------------|------------------|---------------------------------------------------------------|
| van Der Heijde 2006 (NCT00418548) | Etanercept, 50 mg QW or 25 mg BIW, SC injections at Week 0 to Week 12 | Placebo, BIW, SC injections at Week 0 to Week 12 | Phase 3<br># treatment arms, 3<br># centers, 38<br>Randomisation, 3:3:1<br>Blinding: Double | <u>Concurrent</u> : stable (≥4w) dose of NSAIDs | subgroups available<br>Mixed (patients previously treated with bDMARDs less than 4 weeks before baseline were not eligible) | 356     | 12                                   | ASAS20; Week 12  | van der Heijde 2006 <sup>29</sup> (Braun 2007 <sup>30</sup> ) |

<sup>a</sup>Assumption confirmed after consultation with clinical experts.

<sup>b</sup>Number of sites for both trial populations.

Abbreviations: ASAS, Assessment of Spondyloarthritis International Society; ASDAS, Ankylosing Spondylitis Disease Activity Score; BASDAI, Bath Ankylosing Spondylitis Disease Activity Index; BASFI, Bath Ankylosing Spondylitis Functional Index; bDMARD, biologic DMARD; BIW, twice weekly; CFB, change from baseline; CRP, C-reactive protein; CS, corticosteroids; csDMARD, conventional synthetic DMARD; DMARD, disease-modifying antirheumatic drug; HCL, hydroxychloroquine; INF, infliximab; IR, inadequate response and/or intolerance; IV, intravenous; MTX, methotrexate; NR, not reported; NSAID, nonsteroidal anti-inflammatory drug; Q2W, every 2 weeks; Q4W, every 4 weeks; SC, subcutaneous; SSZ, sulfasalazine; TNF, tumor necrosis factor.

Supplementary Table 2: NMA inputs, ASAS40, Bio-naïve populations

| Study               | Intervention Arm | n   | N   |
|---------------------|------------------|-----|-----|
| ATLAS               | PBO              | 14  | 107 |
| ATLAS               | ADA40            | 83  | 208 |
| Bao et al. 2014     | PBO              | 10  | 105 |
| Bao et al. 2014     | GOL50            | 38  | 108 |
| COAST-V             | PBO              | 16  | 87  |
| COAST-V             | ADA40            | 32  | 90  |
| COAST-V             | IXE80Q2W         | 43  | 83  |
| COAST-V             | IXE80Q4W         | 39  | 81  |
| Deodhar et al. 2021 | PBO              | 15  | 105 |
| Deodhar et al. 2021 | TOF5             | 46  | 102 |
| GO-RAISE            | PBO              | 12  | 78  |
| GO-RAISE            | GOL100           | 69  | 140 |
| GO-RAISE            | GOL50            | 62  | 138 |
| Huang et al. 2014   | PBO              | 11  | 115 |
| Huang et al. 2014   | ADA40            | 102 | 229 |
| MEASURE 1           | PBO              | 14  | 89  |
| MEASURE 1           | SEC150           | 45  | 92  |
| MEASURE 2           | PBO              | 8   | 45  |
| MEASURE 2           | SEC150           | 19  | 44  |
| MEASURE 3           | PBO              | 14  | 59  |
| MEASURE 3           | SEC150           | 25  | 57  |
| MEASURE 3           | SEC300           | 25  | 57  |
| MEASURE 4           | PBO              | 25  | 83  |
| MEASURE 4           | SEC150           | 34  | 85  |
| MEASURE 4           | SEC150 (no LD)   | 33  | 85  |
| MEASURE 5           | PBO              | 22  | 122 |
| MEASURE 5           | SEC150           | 102 | 240 |
| SPINE               | PBO              | 10  | 43  |
| SPINE               | ETN25/50         | 17  | 39  |
| SELECT-AXIS-1       | PBO              | 24  | 94  |
| SELECT-AXIS-1       | UPA15            | 48  | 93  |

Abbreviations: ADA, adalimumab; ETN, etanercept; GOL, golimumab; IXE, ixekizumab; n, number achieving ASAS40; N, sample size; PBO, placebo; SEC, secukinumab; TOF, tofacitinib; UPA, upadacitinib



Supplementary Table 3: NMA inputs, ASAS40, Bio-IR populations

| Study                 | Intervention Arm | n  | N   |
|-----------------------|------------------|----|-----|
| COAST-W               | PBO              | 13 | 104 |
| COAST-W               | IXE80Q2W         | 30 | 98  |
| COAST-W               | IXE80Q4W         | 29 | 114 |
| Deodhar et al. 2021   | PBO              | 2  | 31  |
| Deodhar et al. 2021   | TOF5             | 8  | 31  |
| MEASURE 1             | PBO              | 2  | 33  |
| MEASURE 1             | SEC150           | 7  | 33  |
| MEASURE 2             | PBO              | 0  | 29  |
| MEASURE 2             | SEC150           | 7  | 28  |
| MEASURE 3             | PBO              | 2  | 17  |
| MEASURE 3             | SEC150           | 5  | 17  |
| MEASURE 3             | SEC300           | 7  | 19  |
| MEASURE 4             | PBO              | 8  | 34  |
| MEASURE 4             | SEC150           | 11 | 31  |
| MEASURE 4             | SEC150 (no LD)   | 9  | 32  |
| MEASURE 5             | PBO              | 4  | 31  |
| MEASURE 5             | SEC150           | 32 | 65  |
| SELECT-AXIS-2 Study 1 | PBO              | 38 | 209 |
| SELECT-AXIS-2 Study 1 | UPA15            | 94 | 211 |

Abbreviations: IXE, ixekizumab; n, number achieving ASAS40; N, sample size; PBO, placebo; SEC, secukinumab; TOF, tofacitinib; UPA, upadacitinib

Supplementary Table 4: NMA inputs, AEs leading to discontinuation, Overall populations

| Study                      | Intervention Arm | n  | N   |
|----------------------------|------------------|----|-----|
| ATLAS                      | PBO              | 2  | 107 |
| ATLAS                      | ADA40            | 5  | 208 |
| Bao et al. 2014            | PBO              | 1  | 105 |
| Bao et al. 2014            | GOL50            | 1  | 108 |
| Calin et al. 2004          | PBO              | 0  | 39  |
| Calin et al. 2004          | ETN25/50         | 0  | 45  |
| COAST-V                    | PBO              | 0  | 86  |
| COAST-V                    | ADA40            | 1  | 90  |
| COAST-V                    | IXE80Q2W         | 3  | 83  |
| COAST-V                    | IXE80Q4W         | 0  | 81  |
| COAST-W                    | PBO              | 2  | 104 |
| COAST-W                    | IXE80Q2W         | 3  | 98  |
| COAST-W                    | IXE80Q4W         | 10 | 114 |
| Davis et al. 2003          | PBO              | 1  | 139 |
| Davis et al. 2003          | ETN25/50         | 7  | 138 |
| Deodhar et al. 2021        | PBO              | 1  | 136 |
| Deodhar et al. 2021        | TOF5             | 3  | 133 |
| GO-RAISE                   | PBO              | 1  | 77  |
| GO-RAISE                   | GOL100           | 4  | 140 |
| GO-RAISE                   | GOL50            | 4  | 138 |
| Gorman et al. 2002         | PBO              | 0  | 20  |
| Gorman et al. 2002         | ETN25/50         | 0  | 20  |
| Huang et al. 2014          | PBO              | 0  | 115 |
| Huang et al. 2014          | ADA40            | 4  | 229 |
| M03-606                    | PBO              | 0  | 44  |
| M03-606                    | ADA40            | 0  | 38  |
| MEASURE 1                  | PBO              | 5  | 122 |
| MEASURE 1                  | SEC150           | 1  | 125 |
| MEASURE 2                  | PBO              | 4  | 74  |
| MEASURE 2                  | SEC150           | 5  | 72  |
| MEASURE 3                  | PBO              | 0  | 75  |
| MEASURE 3                  | SEC150           | 0  | 74  |
| MEASURE 3                  | SEC300           | 0  | 76  |
| MEASURE 4                  | PBO              | 1  | 117 |
| MEASURE 4                  | SEC150           | 1  | 116 |
| MEASURE 4                  | SEC150 (no LD)   | 2  | 117 |
| MEASURE 5                  | PBO              | 1  | 153 |
| MEASURE 5                  | SEC150           | 2  | 304 |
| Pedersen et al. 2016       | PBO              | 1  | 27  |
| Pedersen et al. 2016       | ADA40            | 1  | 25  |
| SELECT-AXIS-1              | PBO              | 3  | 94  |
| SELECT-AXIS-1              | UPA15            | 2  | 93  |
| SELECT-AXIS-2 Study 1      | PBO              | 3  | 209 |
| SELECT-AXIS-2 Study 1      | UPA15            | 0  | 211 |
| van der Heijde et al. 2006 | PBO              | 0  | 51  |
| van der Heijde et al. 2006 | ETN25/50         | 14 | 305 |

Abbreviations: ADA, adalimumab; ETN, etanercept; GOL, golimumab; IXE, ixekizumab; n, number achieving ASAS40; N, sample size; PBO, placebo; SEC, secukinumab; TOF, tofacitinib; UPA, upadacitinib

## Appendix 1: Systematic Literature Review Citations

1. van der Heijde D, Kivitz A, Schiff MH, et al. Efficacy and safety of adalimumab in patients with ankylosing spondylitis: results of a multicenter, randomized, double-blind, placebo-controlled trial. *Arthritis and rheumatism*. 2006;54(7):2136-46.
2. Bao C, Huang F, Khan MA, et al. Safety and efficacy of golimumab in Chinese patients with active ankylosing spondylitis: 1-year results of a multicentre, randomized, double-blind, placebo-controlled phase III trial. *Rheumatology (Oxford)*. 2014;53(9):1654-63.
3. Calin A, Dijkmans BA, Emery P, et al. Outcomes of a multicentre randomised clinical trial of etanercept to treat ankylosing spondylitis. *Annals of the rheumatic diseases*. 2004;63(12):1594-600.
4. Dijkmans B, Emery P, Hakala M, et al. Etanercept in the longterm treatment of patients with ankylosing spondylitis. *The Journal of rheumatology*. 2009;36(6):1256-64.
5. van der Heijde D, Cheng-Chung Wei J, Dougados M, et al. Ixekizumab, an interleukin-17A antagonist in the treatment of ankylosing spondylitis or radiographic axial spondyloarthritis in patients previously untreated with biological disease-modifying anti-rheumatic drugs (COAST-V): 16 week results of a phase 3 randomised, double-blind, active-controlled and placebo-controlled trial. *Lancet (London, England)*. 2018;392(10163):2441-51.
6. Dougados M, Wei JC, Landewé R, et al. Efficacy and safety of ixekizumab through 52 weeks in two phase 3, randomised, controlled clinical trials in patients with active radiographic axial spondyloarthritis (COAST-V and COAST-W). *Annals of the rheumatic diseases*. 2020;79(2):176-85.
7. CADTH Canadian Drug Expert Committee. Ixekizumab (Taltz). Final Recommendations. Ottawa, Canada: Canadian Agency for Drugs and Technologies in Health; 2020.
8. Deodhar A, Poddubnyy D, Pacheco-Tena C, et al. Efficacy and Safety of Ixekizumab in the Treatment of Radiographic Axial Spondyloarthritis: Sixteen-Week Results From a Phase III Randomized, Double-Blind, Placebo-Controlled Trial in Patients With Prior Inadequate Response to or Intolerance of Tumor Necrosis Factor Inhibitors. *Arthritis & rheumatology (Hoboken, NJ)*. 2019;71(4):599-611.
9. Davis JC, Jr., Van Der Heijde D, Braun J, et al. Recombinant human tumor necrosis factor receptor (etanercept) for treating ankylosing spondylitis: a randomized, controlled trial. *Arthritis and rheumatism*. 2003;48(11):3230-6.
10. Inman RD, Davis JC, Jr., Heijde D, et al. Efficacy and safety of golimumab in patients with ankylosing spondylitis: results of a randomized, double-blind, placebo-controlled, phase III trial. *Arthritis and rheumatism*. 2008;58(11):3402-12.
11. Gorman JD, Sack KE, Davis JC, Jr. Treatment of ankylosing spondylitis by inhibition of tumor necrosis factor alpha. 2002;346:1349-56.
12. Huang F, Gu J, Zhu P, et al. Efficacy and safety of adalimumab in Chinese adults with active ankylosing spondylitis: results of a randomised, controlled trial. *Annals of the rheumatic diseases*. 2014;73(3):587-94.

13. Lambert RG, Salonen D, Rahman P, et al. Adalimumab significantly reduces both spinal and sacroiliac joint inflammation in patients with ankylosing spondylitis: a multicenter, randomized, double-blind, placebo-controlled study. *Arthritis and rheumatism*. 2007;56(12):4005-14.
14. Maksymowych WP, Rahman P, Shojania KAM, et al. Beneficial Effects of Adalimumab on Biomarkers Reflecting Structural Damage in Patients with Ankylosing Spondylitis. *The Journal of rheumatology*. 2008;35(10):2030.
15. Baeten D, Sieper J, Braun J, et al. Secukinumab, an Interleukin-17A Inhibitor, in Ankylosing Spondylitis. *N Engl J Med*. 2015;373(26):2534-48.
16. Deodhar AA, Dougados M, Baeten DL, et al. Effect of Secukinumab on Patient-Reported Outcomes in Patients With Active Ankylosing Spondylitis: A Phase III Randomized Trial (MEASURE 1). *Arthritis & rheumatology (Hoboken, NJ)*. 2016;68(12):2901-10.
17. Sieper J, Deodhar A, Marzo-Ortega H, et al. Secukinumab efficacy in anti-TNF-naive and anti-TNF-experienced subjects with active ankylosing spondylitis: results from the MEASURE 2 Study. *Annals of the rheumatic diseases*. 2017;76(3):571-92.
18. Deodhar A, Conaghan PG, Kvien TK, et al. Secukinumab provides rapid and persistent relief in pain and fatigue symptoms in patients with ankylosing spondylitis irrespective of baseline C-reactive protein levels or prior tumour necrosis factor inhibitor therapy: 2-year data from the MEASURE 2 study. *Clin Exp Rheumatol*. 2019;37(2):260-9.
19. Marzo-Ortega H M-RC, Gill S, Magrey M, Machado P, Shete A, Wang J, Rohrer S, Deodhar A. . Subcutaneous Secukinumab 150 Mg Provides Rapid and Sustained Relief in Total and Nocturnal Back Pains, Morning Stiffness, and Fatigue in Patients with Active Ankylosing Spondylitis over 4 Years [abstract]. *Arthritis Rheumatol*. 2019;71
20. Pavelka K, Kivitz A, Dokoupilova E, et al. Efficacy, safety, and tolerability of secukinumab in patients with active ankylosing spondylitis: a randomized, double-blind phase 3 study, MEASURE 3. *Arthritis research & therapy*. 2017;19(1):285.
21. Kivitz AJ, Wagner U, Dokoupilova E, et al. Efficacy and Safety of Secukinumab 150 mg with and Without Loading Regimen in Ankylosing Spondylitis: 104-week Results from MEASURE 4 Study. *Rheumatol Ther*. 2018;5(2):447-62.
22. Huang F, Sun F, Wan WG, et al. Secukinumab provided significant and sustained improvement in the signs and symptoms of ankylosing spondylitis: results from the 52-week, Phase III China-centric study, MEASURE 5. *Chin Med J (Engl)*. 2020.
23. Pedersen SJ, Poddubnyy D, Sørensen IJ, et al. Course of Magnetic Resonance Imaging-Detected Inflammation and Structural Lesions in the Sacroiliac Joints of Patients in the Randomized, Double-Blind, Placebo-Controlled Danish Multicenter Study of Adalimumab in Spondyloarthritis, as Assessed by the Berlin and Spondyloarthritis Research Consortium of Canada Methods. *Arthritis & rheumatology (Hoboken, NJ)*. 2016;68(2):418-29.
24. van der Heijde D, Song IH, Pangan AL, et al. Efficacy and safety of upadacitinib in patients with active ankylosing spondylitis (SELECT-AXIS 1): a multicentre, randomised, double-blind, placebo-controlled, phase 2/3 trial. *Lancet (London, England)*. 2019;394(10214):2108-17.

25. AbbVie. Clinical Study Report (CSR) AbbVie Data on File. In: AbbVie, editor. February 13, 2019.
26. AbbVie. Clinical Study Report (CSR) AbbVie Data on File. In: AbbVie, editor. September 30, 2021.
27. Dougados M, Braun J, Szanto S, et al. Efficacy of etanercept on rheumatic signs and pulmonary function tests in advanced ankylosing spondylitis: results of a randomised double-blind placebo-controlled study (SPINE). *Annals of the rheumatic diseases*. 2011;70(5):799-804.
28. Deodhar A, Sliwiska-Stanczyk P, Xu H, et al. Tofacitinib for the treatment of ankylosing spondylitis: a phase III, randomised, double-blind, placebo-controlled study. *Annals of the rheumatic diseases*. 2021.
29. van der Heijde D, Da Silva JC, Dougados M, et al. Etanercept 50 mg once weekly is as effective as 25 mg twice weekly in patients with ankylosing spondylitis. *Annals of the rheumatic diseases*. 2006;65(12):1572-7.
30. Braun J, McHugh N, Singh A, Wajdula JS, Sato R. Improvement in patient-reported outcomes for patients with ankylosing spondylitis treated with etanercept 50 mg once-weekly and 25 mg twice-weekly. *Rheumatology (Oxford)*. 2007;46(6):999-1004.

Supplementary Figure 1: Network Diagrams by Study Population

### A. Bio-Naïve NMA

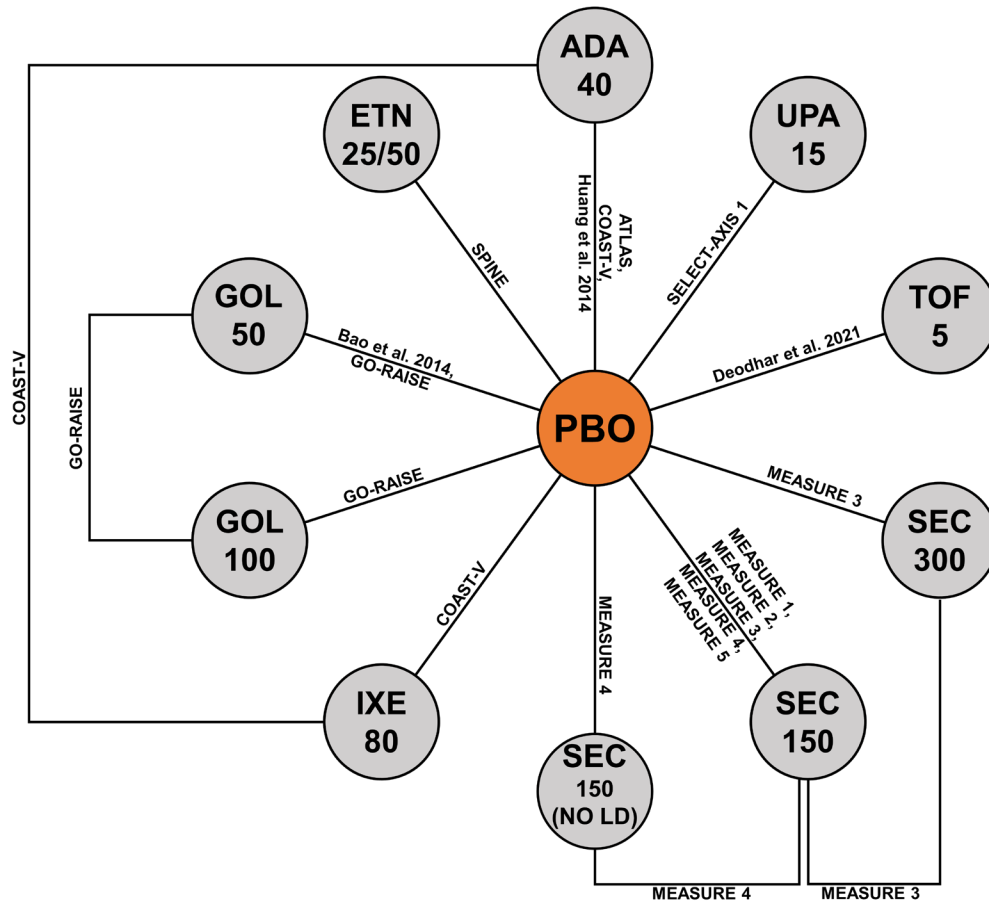

**B. Bio-IR and TNFi-Experienced NMA**

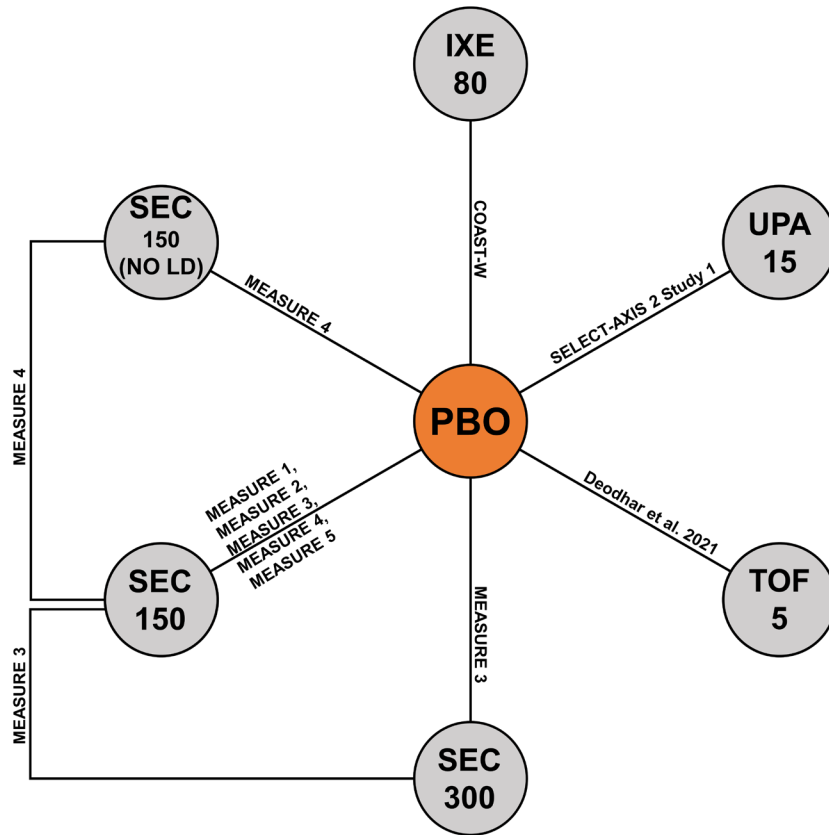

### C. Safety Outcome NMA

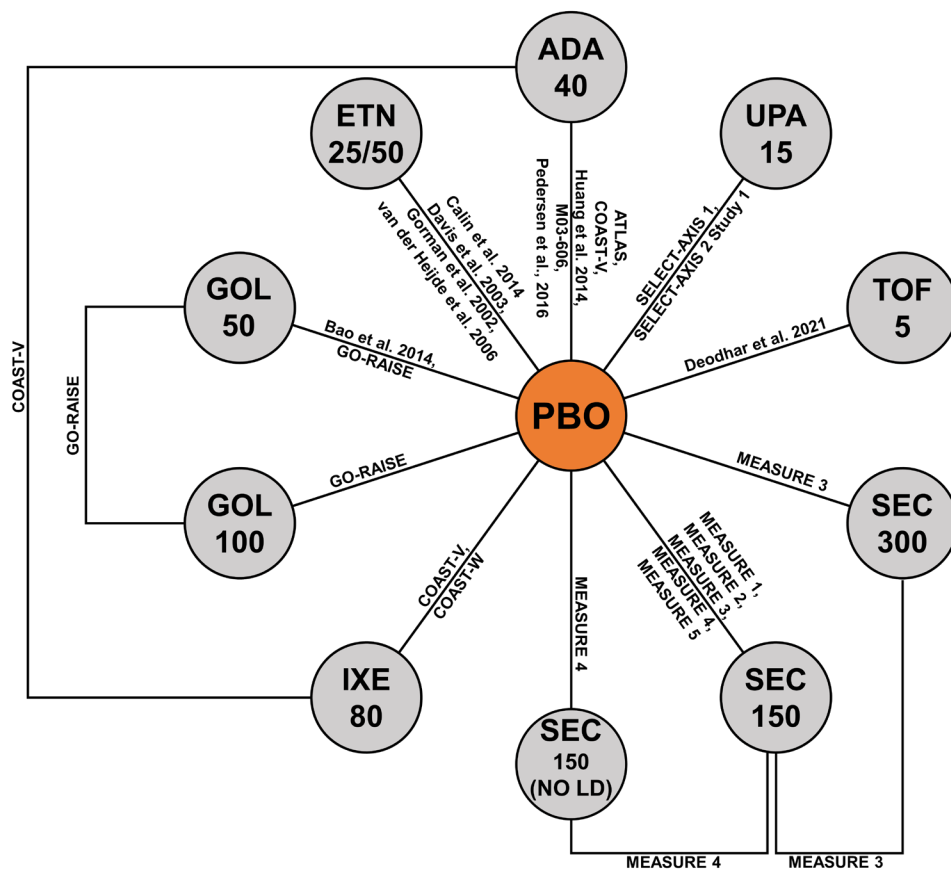

ADA 40, adalimumab 40 mg; Bio, biologic disease-modifying antirheumatic drug; ETN 25/50, etanercept 25/50 mg; GOL 50 or 100, golimumab 50 mg or 100 mg; IR, inadequate response or intolerance; IXE 80, ixekizumab 80 mg; LD, loading dose; NMA, network meta-analysis; PBO, placebo; SEC 300 or 150, secukinumab 300 mg or 150 mg; TNFi, tumor necrosis factor inhibitor; TOF 5, tofacitinib 5 mg; UPA 15, upadacitinib 15 mg.



Supplementary Figure 2: Absolute ASAS40 response rates at weeks 12–16 among TNF-IR patients

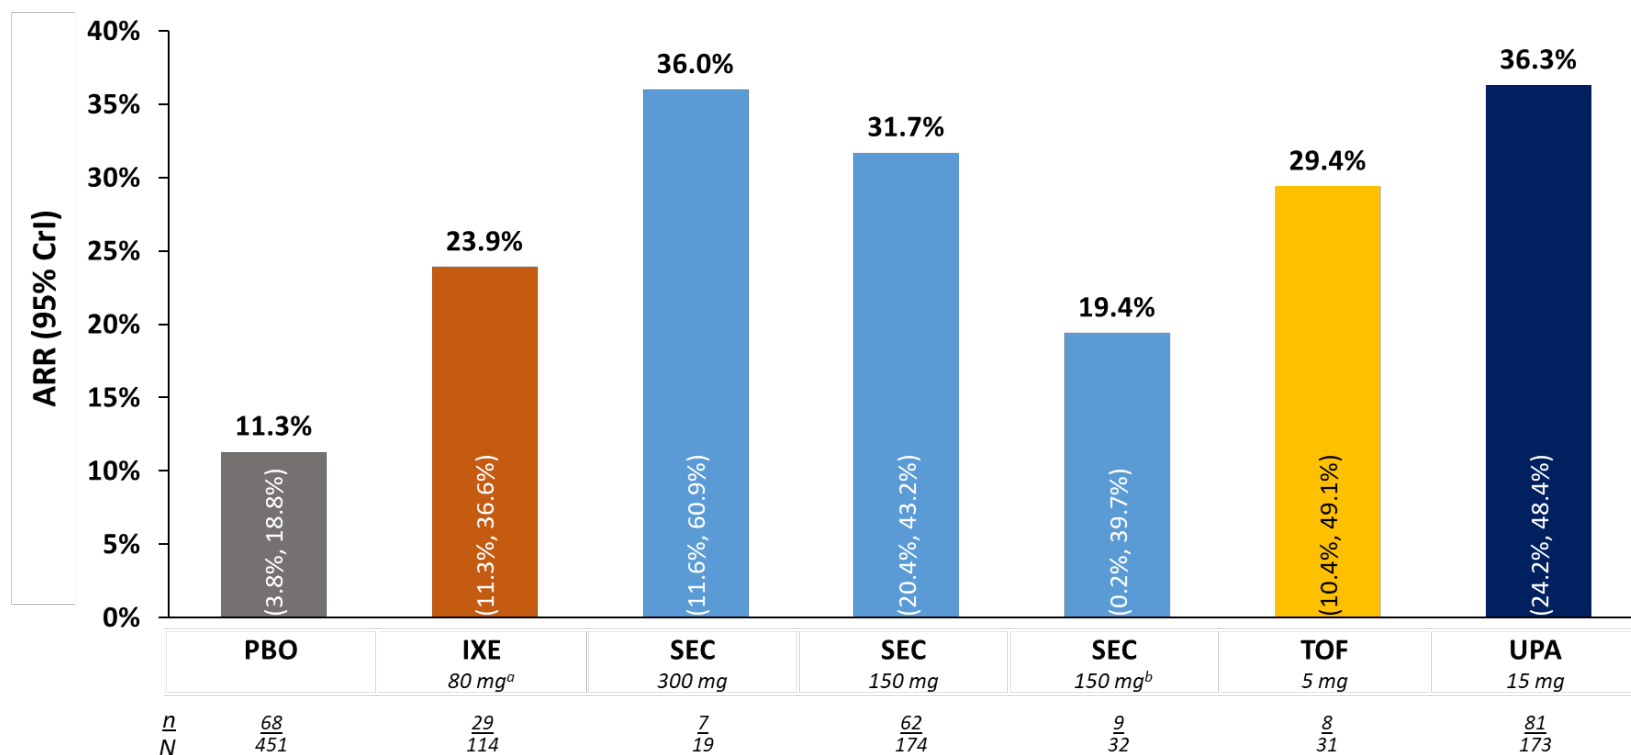

<sup>a</sup>IXE 80 mg was administered every 4 weeks. <sup>b</sup>Patients received SEC 150 mg without a loading dose. ARR, absolute rate ratio; ASAS40, Assessment of Spondyloarthritis International Society improvement  $\geq 40\%$ ; CrI, credible interval; IR, inadequate response or intolerance; IXE, ixekizumab; PBO, placebo; SEC, secukinumab; TNF, tumor necrosis factor; TOF, tofacitinib; UPA, upadacitinib.

Supplementary Figure 3: Number needed to treat to achieve ASAS40 at weeks 12–16 among TNF-IR patients

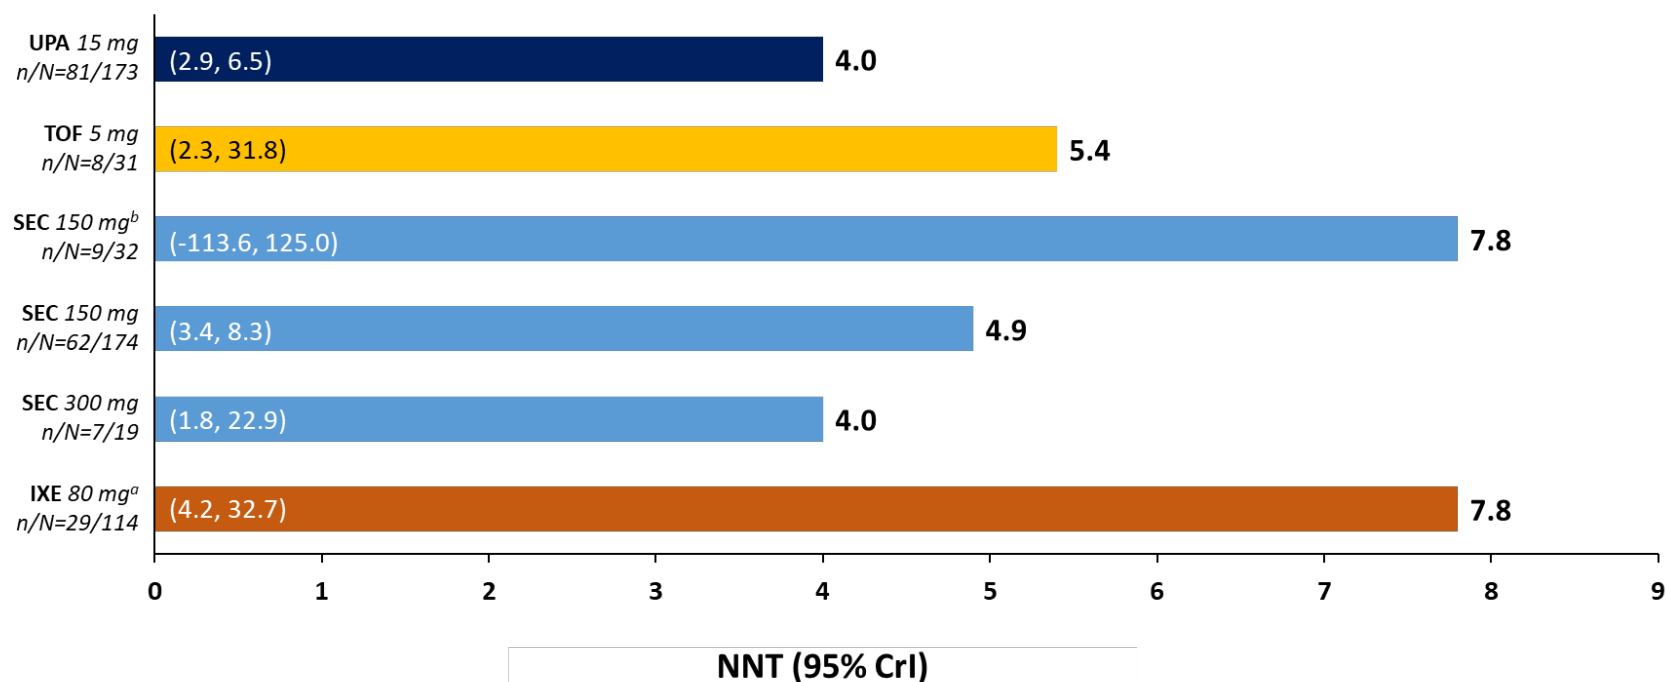

<sup>a</sup>IXE 80 mg was administered every 4 weeks. <sup>b</sup>Patients received SEC 150 mg without a loading dose. ASAS40, Assessment of Spondyloarthritis International Society improvement  $\geq 40\%$ ; CrI, credible interval; IR, inadequate response or intolerance; IXE, ixekizumab; NNT, number needed to treat; PBO, placebo; SEC, secukinumab; TNF, tumor necrosis factor; TOF, tofacitinib; UPA, upadacitinib.

Supplementary Figure 4: Cost per responder for ASAS40 over 16 weeks among TNF-IR patients

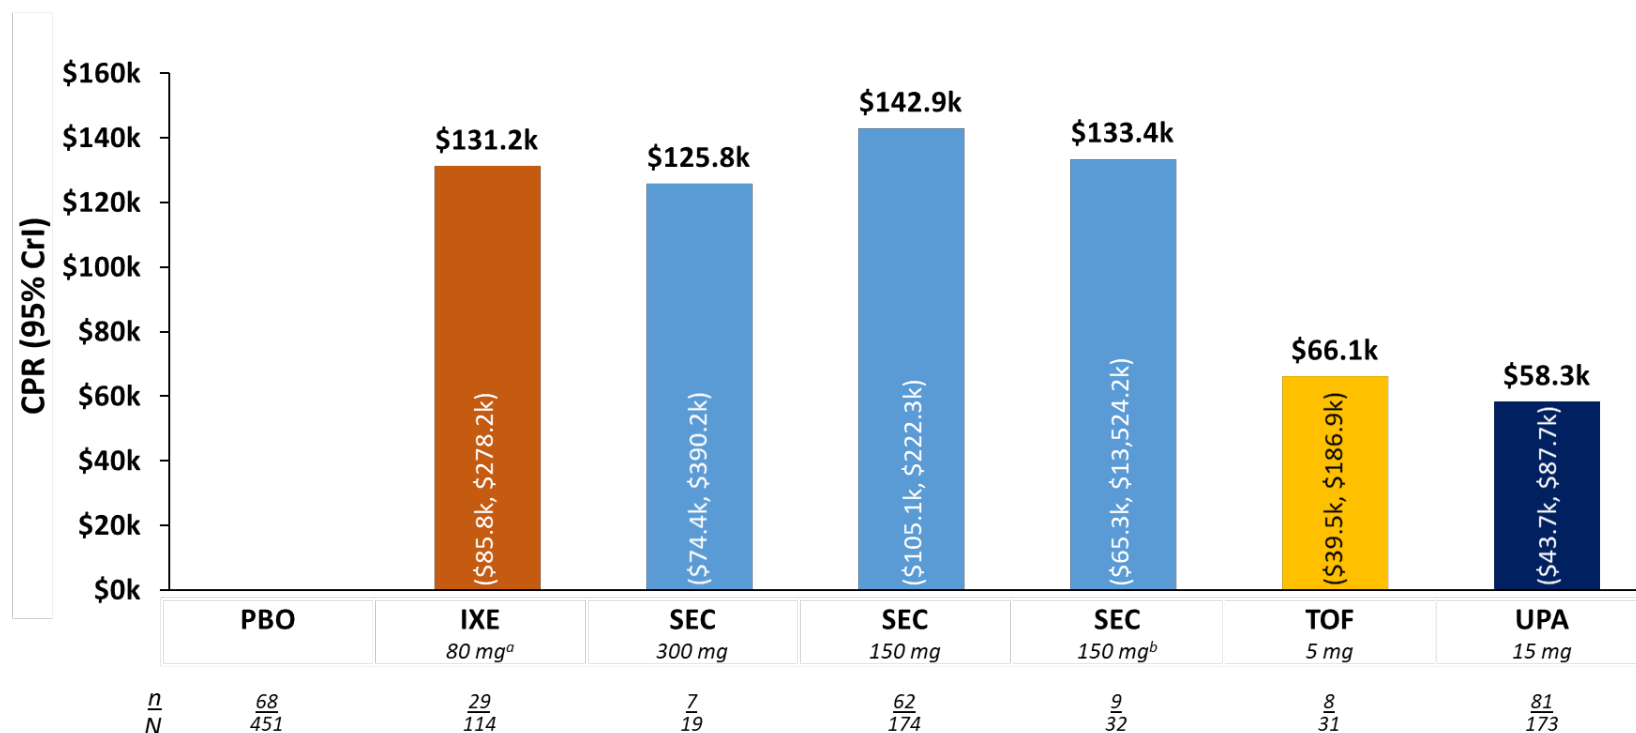

<sup>a</sup>IXE 80 mg was administered every 4 weeks. <sup>b</sup>Patients received SEC 150 mg without a loading dose. ARR, absolute rate ratio; ASAS40, Assessment of Spondyloarthritis International Society improvement  $\geq 40\%$ ; CPR, cost per responder; CrI, credible interval; IR, inadequate response or intolerance; IXE, ixekizumab; PBO, placebo; SEC, secukinumab; TNF, tumor necrosis factor; TOF, tofacitinib; UPA, upadacitinib.
